# Supplementary material
Source: PubMed Central journal article supplement (PMC7344067)
Supplement: ajtr0012-2903-f8.pdf [file ajtr0012-2903-f8.pdf]

## Redifferentiation of dedifferentiated microtia chondrocytes

**Supplementary Table 1.** Primer sequence used for quantitative Real-Time PCR

| Gene name                                | Gene symbol | Forward primer           | Reverse primer           |
|------------------------------------------|-------------|--------------------------|--------------------------|
| Glyceraldehyde-3-phosphate dehydrogenase | GAPDH       | 5-CTGCCCTTCTGCTGATGC-3   | 5-TCCACGATGCCGAAGTTGTC-3 |
| Collagen II, type II alpha 1             | COL 2A1     | 5-TCCTGGTGAAGATGGTCGC-3  | 5-AGCACCTGTCTCGCCATCT-3  |
| Aggrecan                                 | ACAN        | 5-GAATCTAGCAGGGAGTCATC-3 | 5-CTGAAAGGCTGAGGTGCTG-3  |

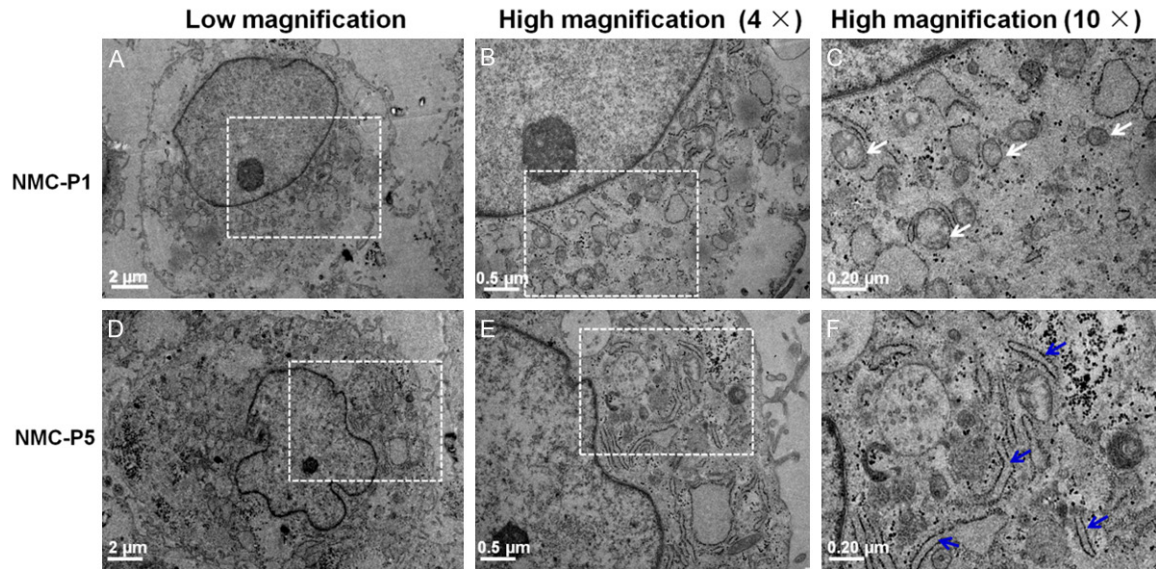

**Supplementary Figure 1.** The ultrastructural characteristics of dedifferentiated chondrocytes (NMC P5) and non-dedifferentiated chondrocytes (NMC P1). Dedifferentiated chondrocytes showed segmented nuclei with smaller nucleoli at low power (D), while non-dedifferentiated chondrocytes showed larger nuclei and nucleoli (A). At high magnification, the dedifferentiated chondrocytes have a greater amount of smooth endoplasmic reticulum (blue arrow) but fewer secretory vesicles compared with the non-dedifferentiated chondrocytes (E, F), which contain abundant secretory vesicles (white arrow) with less smooth endoplasmic reticulum (B, C).

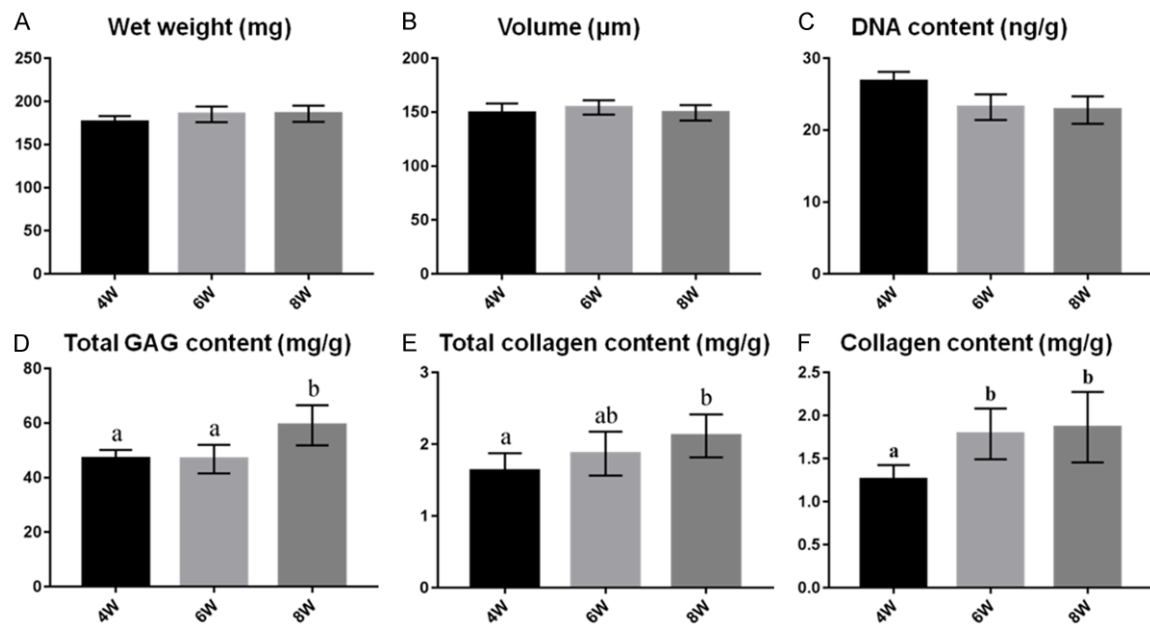

**Supplementary Figure 2.** Biochemical evaluation of chondrocyte-PGA/PLA constructs at various time points. None of the samples exhibited a significant difference in wet weight (A), volume (B), or DNA content (C). However, GAG, total collagen, and collagen II contents (D-F) exhibited an obvious increasing trend with *in vitro* culture time. Columns with different letters indicate statistical significance.

## Redifferentiation of dedifferentiated microtia chondrocytes

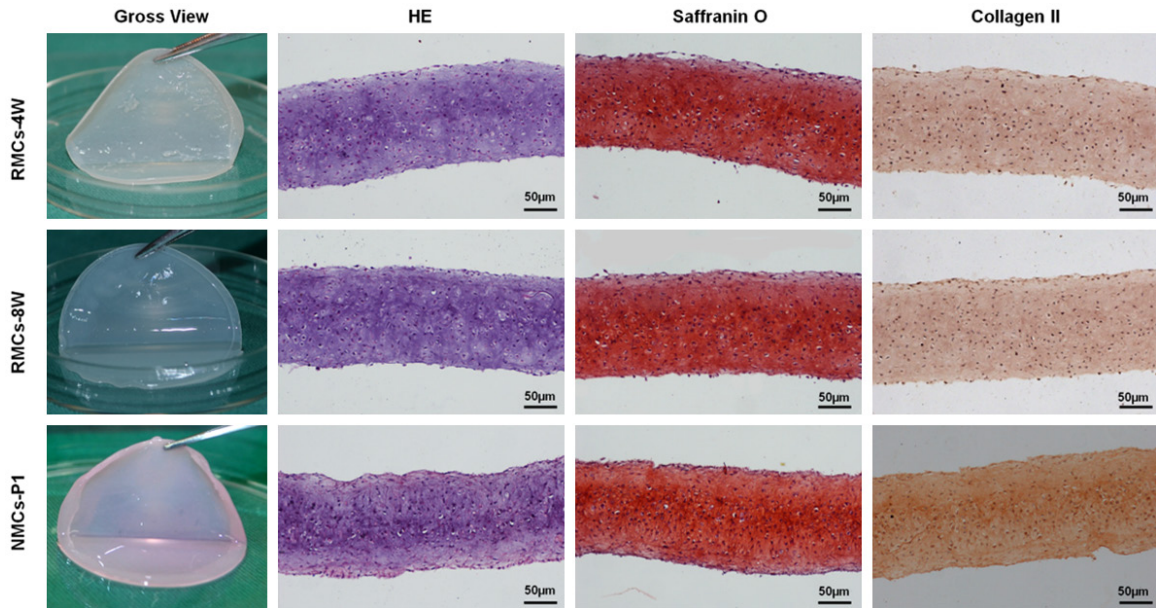

**Supplementary Figure 3.** Overall appearance and cartilage-specific staining of cell-sheet cartilage formed by RMCs. All chondrocytes from RMC-4W and RMC-8W groups formed ivory-white cartilage sheet tissues after 6 weeks of *in vitro* culture. Moreover, these *in vitro*-engineered cartilages showed typical lacuna structures with strong positive staining of Safranin-O and COL II. Furthermore, none of the engineered cartilage sheets formed by RMCs showed significant differences in overall appearance or histological evaluation compared with those formed by native P1 chondrocytes.
